# Supplementary material for: Hierarchical ultrathin-branched CdS nanowire arrays with enhanced photocatalytic performance
Source: Royal Society of Chemistry journal article supplement (doi:10.1039/c5ta05422b), 2015-01-01
Supplement: c5ta05422b1.pdf [file c5ta05422b1.pdf]

## Supporting Information

# Hierarchical ultrathin-branched CdS nanowire arrays with enhanced photocatalytic performance

Yi Huang,<sup>a</sup> You Xu,<sup>a</sup> Jin Zhang,<sup>a</sup> Xuguang Yin,<sup>a</sup> Yamei Guo<sup>a</sup> and Bin Zhang<sup>\*ab</sup>

<sup>a</sup> Department of Chemistry, School of Science, Tianjin University, and Collaborative Innovation Centre of Chemical Science and Engineering (Tianjin), Tianjin 300072, China.

<sup>b</sup> The Key Lab of Systems Bioengineering (Tianjin University), Ministry of Education, Tianjin 300072, China.

E-mail: bzhang@tju.edu.cn

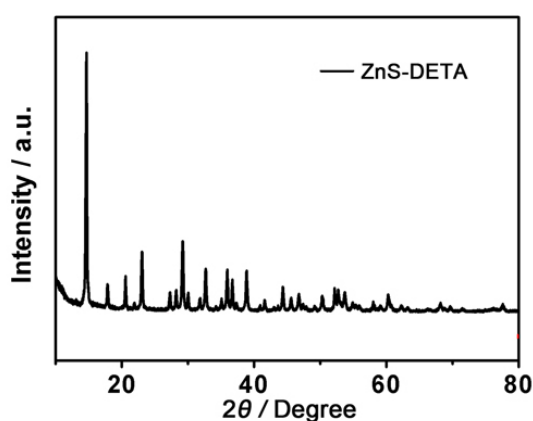

**Fig. S1** XRD patterns of ZnS-DETA hybrid nanosheets. The crystal structure of semiconductor-amine is similar with our previous report (Y. F. Yu, J. Zhang, X. Wu, W. Zhao, B. Zhang, *Angew. Chem. Int. Ed.* 2012, 51, 897.), showing that the ZnS-DETA hybrid nanosheets have been successfully synthesized. After complete reaction with  $\text{Cd}^{2+}$ , the inorganic-organic hybrid nanosheets become the inorganic 3DHU-CdS, as displayed in XRD patterns (Figure 2a).

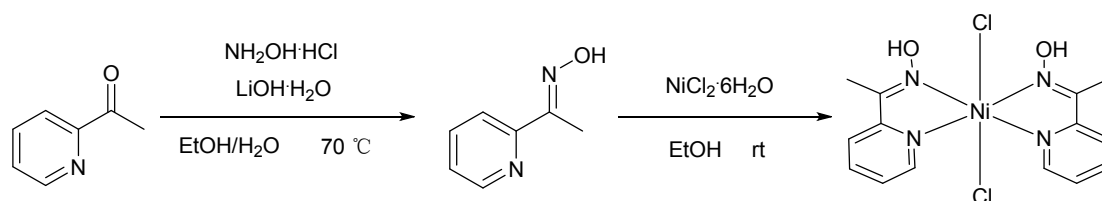

**Scheme S1** The synthetic route for Complex I.

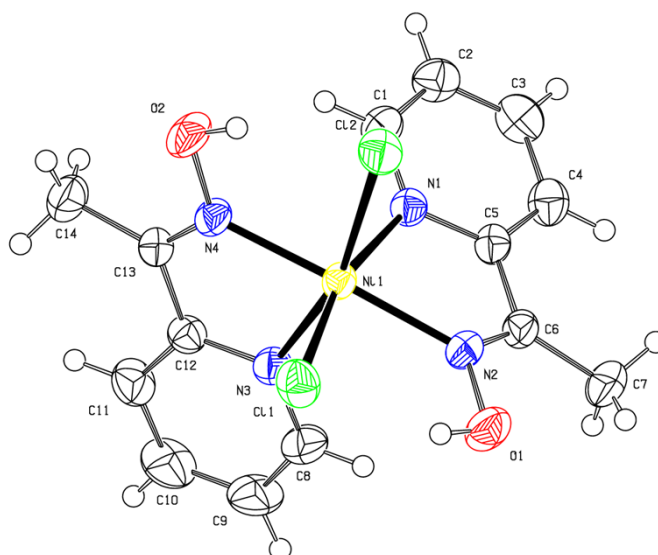

**Fig. S2** X-ray crystal structure diagram for Complex I.

**Table S1** Crystal data and structure refinement for Complex I

|                                     |                                                                                  |                                                                                  |
|-------------------------------------|----------------------------------------------------------------------------------|----------------------------------------------------------------------------------|
| Bond precision: C-C = 0.0035 Å      | Wavelength=0.71073                                                               |                                                                                  |
| Cell: a=8.6258(8)                   | b=10.8561(11)                                                                    | c=19.8668(17)                                                                    |
| alpha=90                            | beta=114.307(4)                                                                  | gamma=90                                                                         |
| Temperature: 294 K                  |                                                                                  |                                                                                  |
|                                     | Calculated                                                                       | Reported                                                                         |
| Volume                              | 1695.5(3)                                                                        | 1695.5(3)                                                                        |
| Space group                         | P 21/c                                                                           | P21/c                                                                            |
| Hall group                          | -P 2ybc                                                                          | ?                                                                                |
| Moiety formula                      | C <sub>14</sub> H <sub>16</sub> C <sub>12</sub> N <sub>4</sub> Ni O <sub>2</sub> | ?                                                                                |
| Sum formula                         | C <sub>14</sub> H <sub>16</sub> C <sub>12</sub> N <sub>4</sub> Ni O <sub>2</sub> | C <sub>14</sub> H <sub>16</sub> C <sub>12</sub> N <sub>4</sub> Ni O <sub>2</sub> |
| Mr                                  | 401.90                                                                           | 401.92                                                                           |
| D <sub>x</sub> , g cm <sup>-3</sup> | 1.574                                                                            | 1.575                                                                            |
| Z                                   | 4                                                                                | 4                                                                                |
| Mu (mm <sup>-1</sup> )              | 1.472                                                                            | 1.472                                                                            |
| F <sub>000</sub>                    | 824.0                                                                            | 824.0                                                                            |
| F <sub>000</sub> '                  | 826.75                                                                           |                                                                                  |
| h,k,lmax                            | 11, 14, 25                                                                       | 11, 14, 25                                                                       |
| Nref                                | 3895                                                                             | 3869                                                                             |
| Tmin,Tmax                           | 0.853, 0.929                                                                     | 0.666, 0.930                                                                     |
| Tmin'                               | 0.643                                                                            |                                                                                  |
| Correction method= MULTI-SCAN       |                                                                                  |                                                                                  |
| Data completeness= 0.993            | Theta(max)= 27.500                                                               |                                                                                  |
| R(reflections)= 0.0321( 3398)       | wR2(reflections)= 0.0819( 3869)                                                  |                                                                                  |
| S=1.057                             | Npar=210                                                                         |                                                                                  |

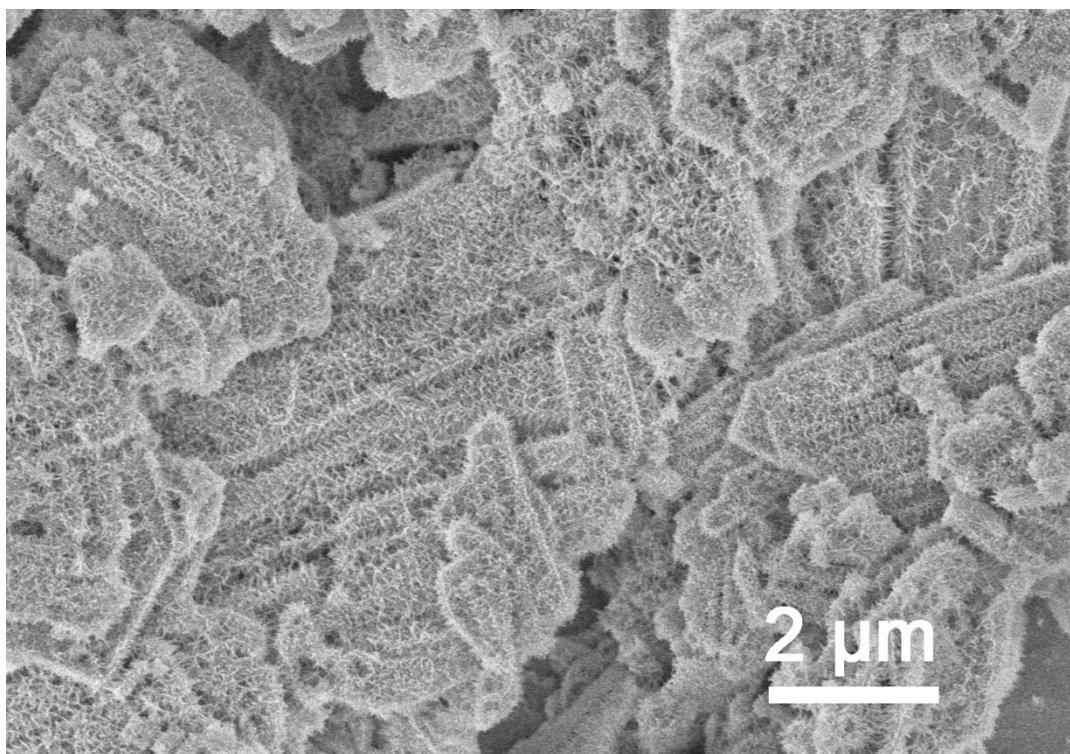

**Fig. S3** Low-magnification SEM image of 3DHU-CdS. The solid 2D nanosheets are transformed to branched nanostructure completely, however, the 2D morphology keep unchanged.

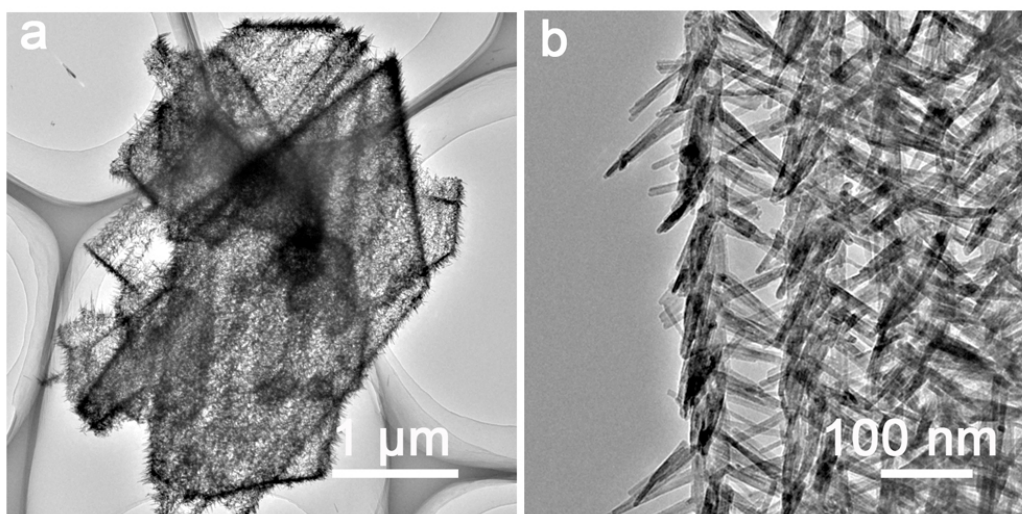

**Fig. S4** TEM images of 3DHU-CdS. TEM images further reveal the formation of branched nanowire arrays. The branched nanowires are neatly arrayed so that they can present the form of arrays with the retention of the sheet-like macroscopic morphology. The array structure of branched nanowires become more and more obvious with increasing the reaction temperature (Figure S7c-e).

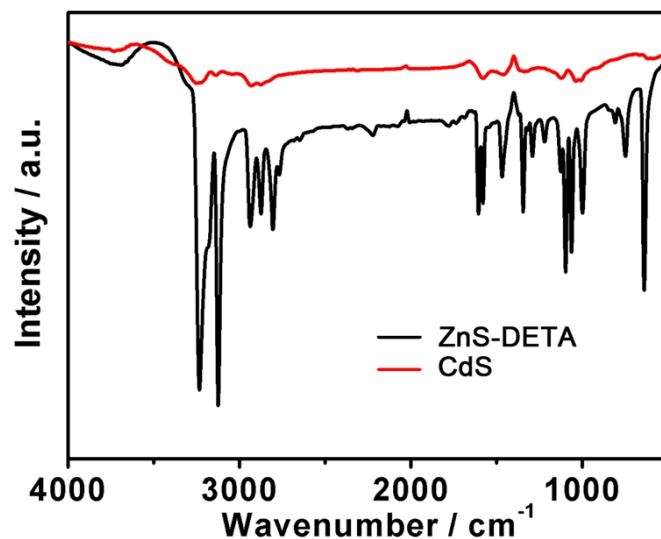

**Fig. S5** FTIR spectra of hybrid precursors (black line) and 3DHU-CdS (red line). The absorption peaks centered at 3300-3400  $\text{cm}^{-1}$  and 1532-1680  $\text{cm}^{-1}$  can be attributed to the characteristic vibration of N-H stretching and  $-\text{NH}_2$  stretching vibration. This indicates that inorganic-organic hybrid nanosheets can be successfully transformed into inorganic materials.

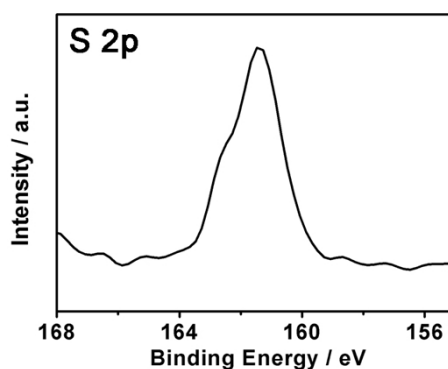

**Fig. S6** The high-resolution S 2p XPS spectra of 3DHU-CdS. The low binding energy peaks of S 2p spectra at 161.5 eV is indicative of metal sulfide.



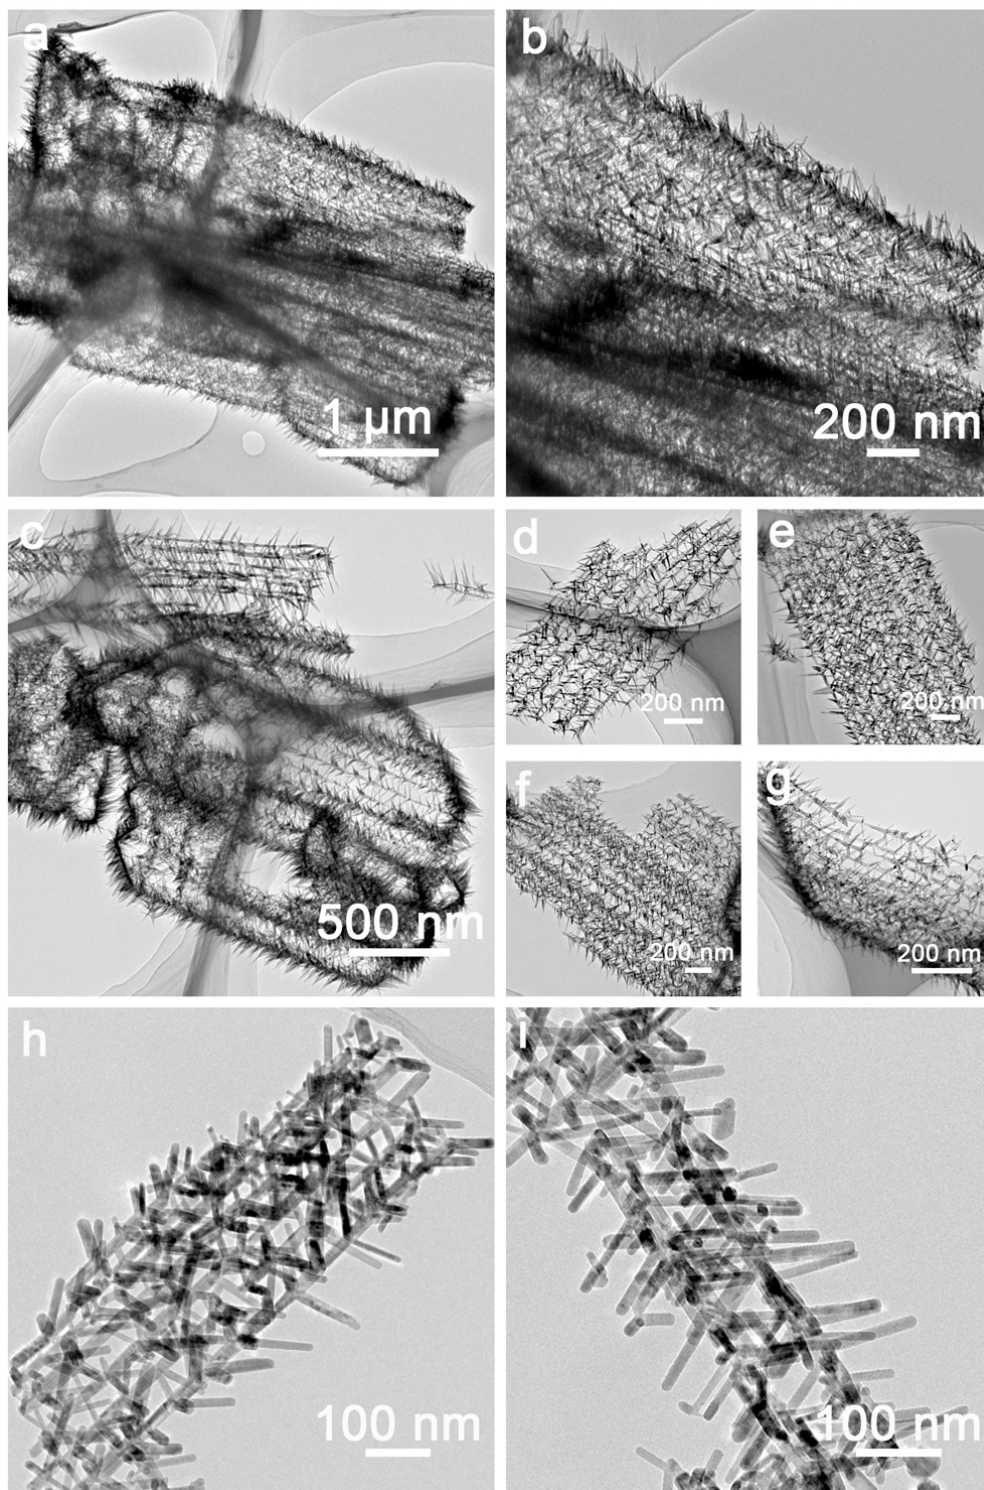

**Fig. S7** TEM images of the 3DHU-CdS prepared at different temperatures: (a-b) 80 °C; (c-g) 160 °C; (h-i) 220 °C.

As observed in above TEM images, the hybrid nanosheets can be transformed into 3DHU-CdS at the temperatures ranging from 80 to 220 °C and all the products present the form of branched nanowire arrays. The sheet-like morphology can keep unchanged at low temperature (Figure S7a, b). However, with increasing the temperature, the sheet-like morphology are broken to a certain extent, the nanowire arrays are still observed (Figure S7c-i).

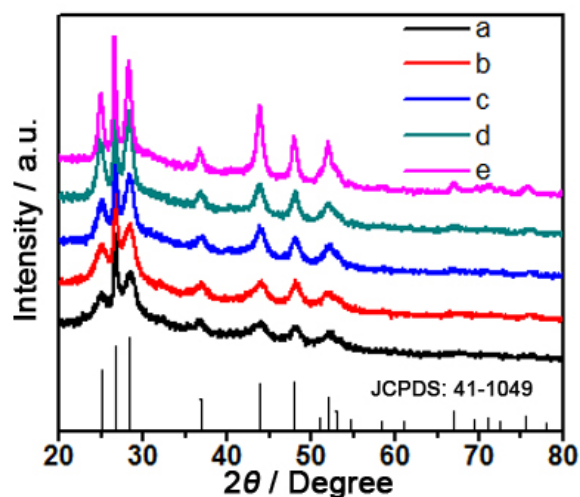

**Fig. S8** XRD patterns of the 3DHU-CdS prepared at different temperature: a) 80 °C; b) 160 °C; c) 180 °C; d) 200 °C; e) 220 °C. This indicates that all the 3DHU-CdS prepared at different temperature are assigned to hexagonal phase of CdS (JCPDS No. 41-1409).

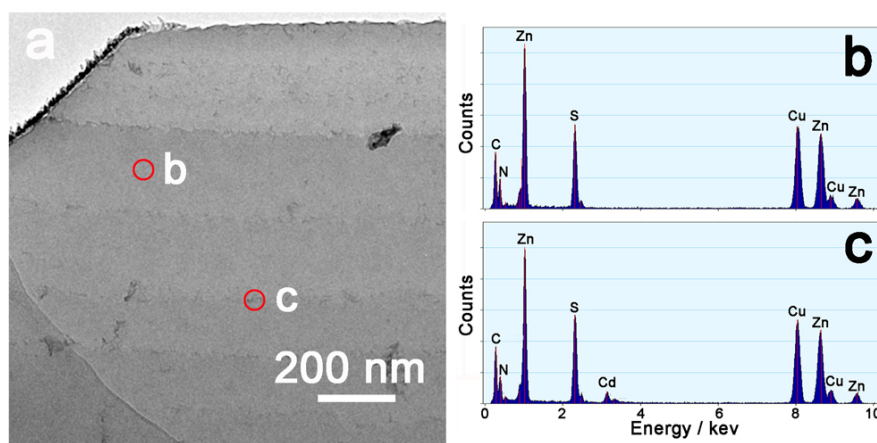

**Fig. S9** a) TEM image of the intermediates collected after the reaction of ZnS-DETA with  $\text{Cd}^{2+}$  ions at 120 °C proceeded for 0.5 h. The b and c in (a) indicate the positions where the EDS spectras for (b) and (c) are collected.

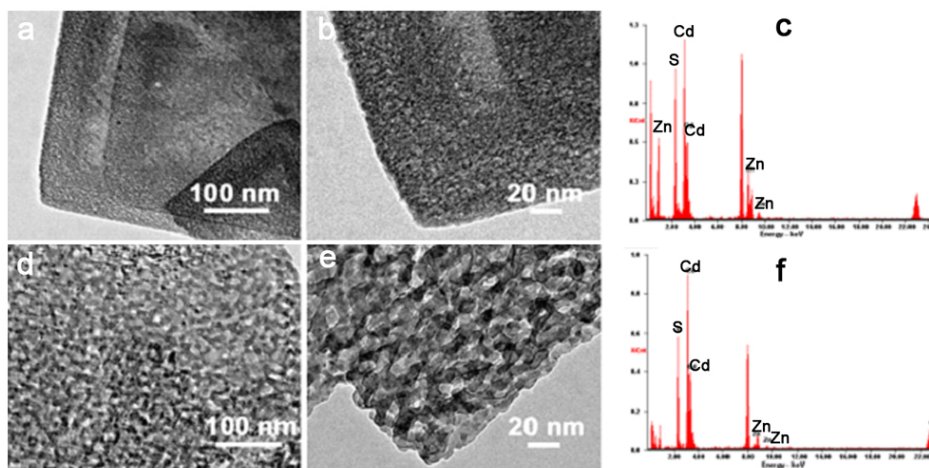

**Fig. S10** TEM images (a, b, d, e) and EDS spectra (c, f) of intermediates collected at different stages of cation-exchange reaction in pure water whereas other conditions remain unchanged; (a-c) 0.5 h; (d-f) 3 h. When the cation-exchange reaction proceeds for 0.5h, the sheets become rough with voids (Figure S10 a,b). The associated EDS spectra (Figure S10c) reveals that most of zinc ions in ZnS-DETA have been exchanged with cadmium cation in a very short time, suggesting the rapid kinetic of this cation-exchange reaction. No selectivity on the cation exchange of  $\text{Cd}^{2+}$  ions with  $\text{Zn}^{2+}$  ions in hybrid nanosheets is observed. With the continuous increase of the reaction time, the ratio of zinc in  $\text{Cd}_x\text{Zn}_{(1-x)}\text{S}$ -amine is decreasing, and the pores become bigger due to the correlating roles of the strain-driven voids and the dissolution of DETA in aqueous media during cation-exchange reaction (Y. Yu, J. Zhang, X. Wu, W. Zhao, B. Zhang, *Angew. Chem. Int. Ed.* 2012, 51, 897.).

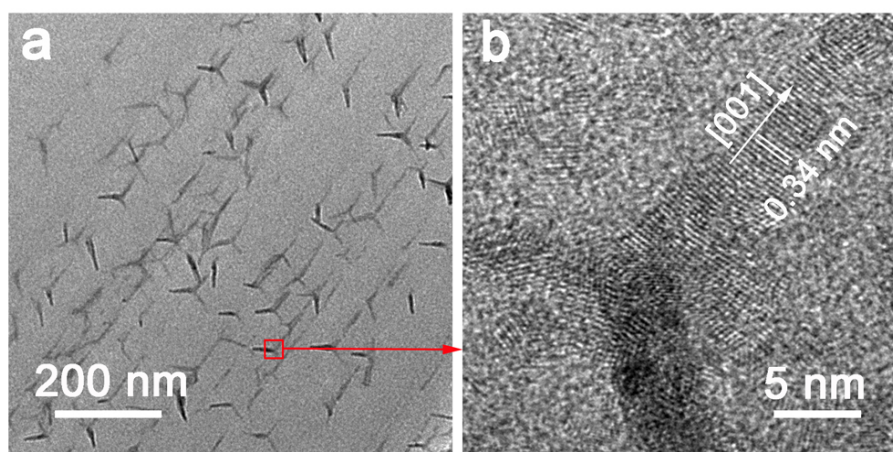

**Fig. S11** TEM image and HRTEM image of the intermediates collected after the reaction of ZnS-DETA with  $\text{Cd}^{2+}$  ions at 120 °C proceeded for 2 h.



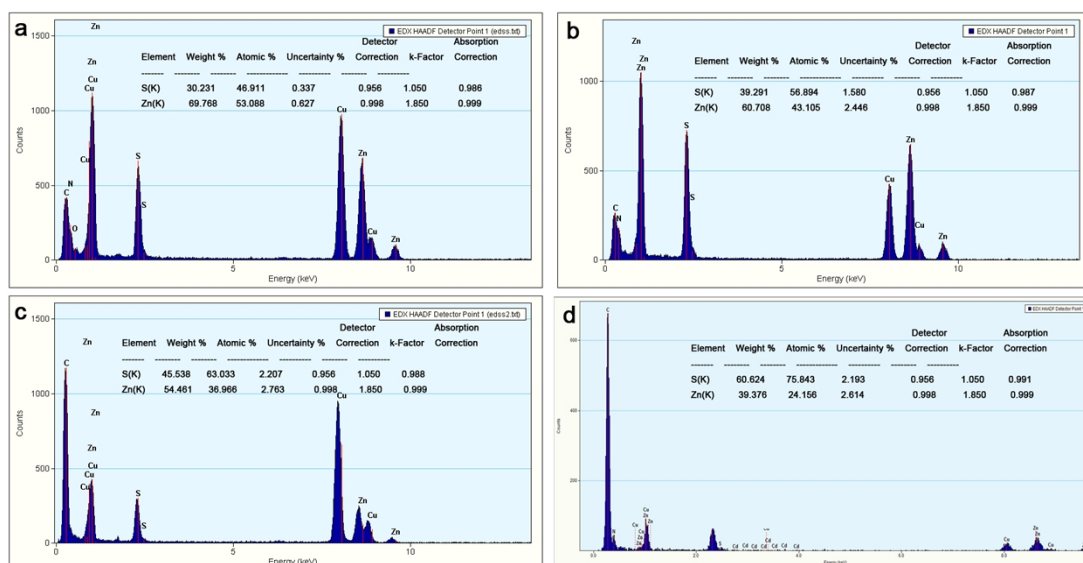

**Fig. S12** The point-scan EDS spectras of the stating hybrid nanosheets (a) and the smooth regions on the intermediates: b) 0.5 h; c) 2 h; d) 4 h. The circles in Figure 2d-f indicate the positions where the EDS spectra were obtained. Cu is observed in the spectra and C is not only origin from the nanosheets but also the carbon films because carbon films on copper grids were used as TEM substrates.

**Table S2.** The summary of the molar ratios of Zn to S of the stating hybrid nanosheets and the smooth regions on the intermediates.

| Reaction time (h) | The molar ratio of Zn/S | Error   |
|-------------------|-------------------------|---------|
| 0                 | 1.029                   | ± 0.022 |
| 0.5               | 0.759                   | ± 0.064 |
| 2                 | 0.593                   | ± 0.061 |
| 4                 | 0.320                   | ± 0.043 |



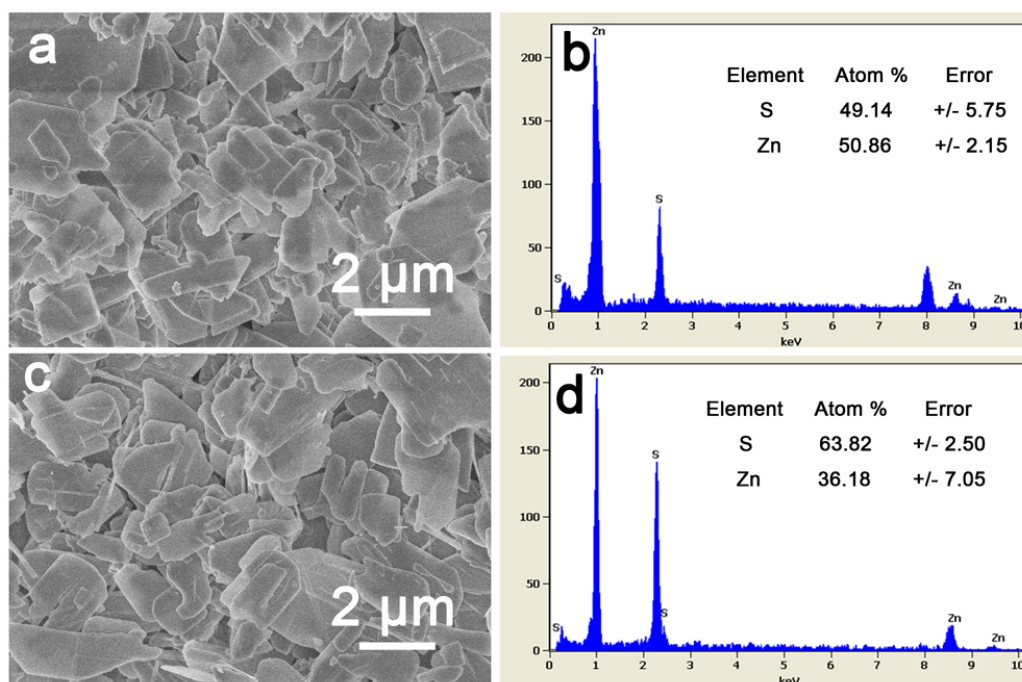

**Fig. S13** SEM images (a, c) and EDS spectra (b, d) of the treatment of ZnS-DETA hybrid nanosheets in the mixture solution of DETA and water at 120 °C for different time: a, b) 0 h; c, d) 10 h. As shown in this Figure, after the treatment of hybrid nanosheets in the mix solution of DETA and water for 10 h, the morphology of the hybrid nanosheets kept unchanged. However, the relative content of element Zn decreased clearly. In addition, we also collected the supernatants after centrifugation. After adding the excessive  $\text{Na}_2\text{S}$  in supernatant, we could collect the white precipitate which was identified as ZnS by XRD pattern and EDS spectra. These results suggest that  $\text{Zn}^{2+}$  in the hybrid nanosheets can be extracted by the induced role *via* the coordination of DETA molecules with zinc in the mix solution, as observed in some previous reports (H. Zhang, H. Wang, Y. Xu, S. Zhuo, Y. Yu, B. Zhang, *Angew. Chem. Int. Ed.* 2012, 51, 1459; S. K. Han, C. Gu, M. Gong, S. H. Yu, *J. Am. Chem. Soc.* 2015, 137, 5390.)

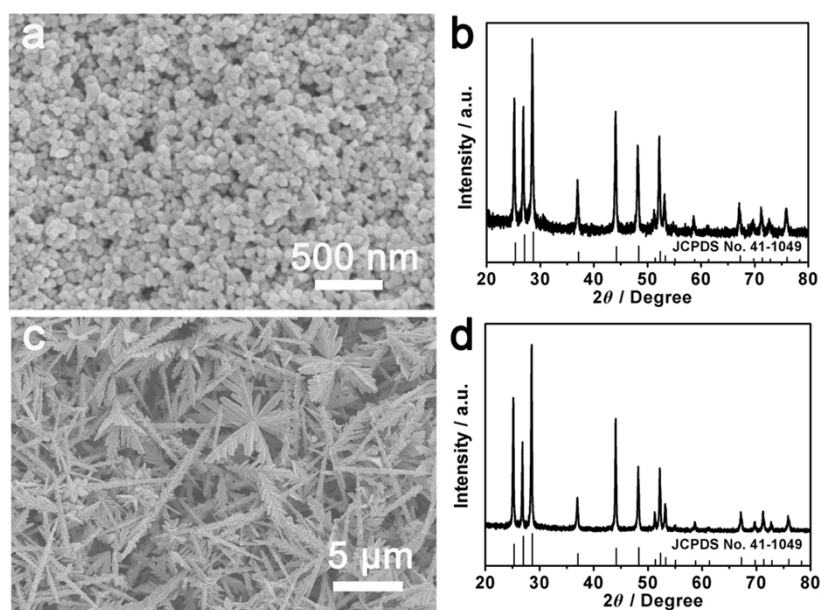

**Fig. S14** a-b) SEM image (a) and XRD pattern (b) of CdS NPs. c-d) SEM image (c) and XRD pattern (d) of CdS MDs. The XRD patterns indicate the CdS NPs and CdS MDs all are assigned to hexagonal phase of CdS (JCPDS No. 41-1409).

**Table S3.** Summary of the band gap values, BET, H<sub>2</sub>-production rate and QY of various CdS-based photocatalysts.

| Photocatalysts | Band gap <sup>a</sup><br>(eV) | BET <sup>b</sup> (m <sup>2</sup> g <sup>-1</sup> ) | Rate of H <sub>2</sub> -<br>production<br>(μmol h <sup>-1</sup> / 5 mg) | Rate of H <sub>2</sub> -<br>production /<br>BET surface area<br>(μmol h <sup>-1</sup> m <sup>-2</sup> ) | QY (%)     |
|----------------|-------------------------------|----------------------------------------------------|-------------------------------------------------------------------------|---------------------------------------------------------------------------------------------------------|------------|
| CdS NPs        | 2.36                          | 16.25                                              | 0.85 ± 0.3                                                              | 10.46                                                                                                   | 0.067±0.04 |
| CdS MDs        | 2.32                          | 4.80                                               | Trace                                                                   | Trace                                                                                                   | Trace      |
| 3DHU-CdS       | 2.42                          | 43.48                                              | 16.3 ± 0.5                                                              | 74.98                                                                                                   | 0.76±0.06  |

<sup>a</sup> the band gap values were estimated from the UV-vis diffuse reflectance spectra;

<sup>b</sup> the surface area was calculated using the Brunauer-Emmett-Teller method.

**Table S4.** Summary of the band gap values and H<sub>2</sub> production rate of the 3DHU-CdS prepared at different temperatures.

| Temperature (°C) | Band gap <sup>a</sup> (eV) | Rate of H <sub>2</sub> -production<br>( $\mu\text{mol h}^{-1}/ 5 \text{ mg}$ ) | QY (%)          |
|------------------|----------------------------|--------------------------------------------------------------------------------|-----------------|
| 80               | 2.43                       | $17.6 \pm 0.6$                                                                 | $0.83 \pm 0.08$ |
| 120              | 2.42                       | $16.3 \pm 0.5$                                                                 | $0.76 \pm 0.06$ |
| 160              | 2.42                       | $15.7 \pm 0.4$                                                                 | $0.72 \pm 0.05$ |
| 180              | 2.34                       | $10.6 \pm 0.7$                                                                 | $0.41 \pm 0.08$ |
| 200              | 2.33                       | $5.2 \pm 0.3$                                                                  | $0.20 \pm 0.04$ |
| 220              | 2.32                       | $4.9 \pm 0.3$                                                                  | $0.19 \pm 0.04$ |

<sup>a</sup> the band gap values were estimated from the UV-vis diffuse reflectance spectra.

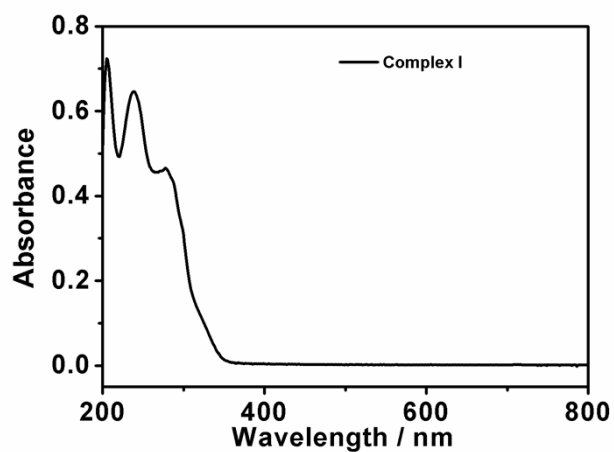

**Fig. S15** UV-Vis absorption spectrum of Complex I in water.

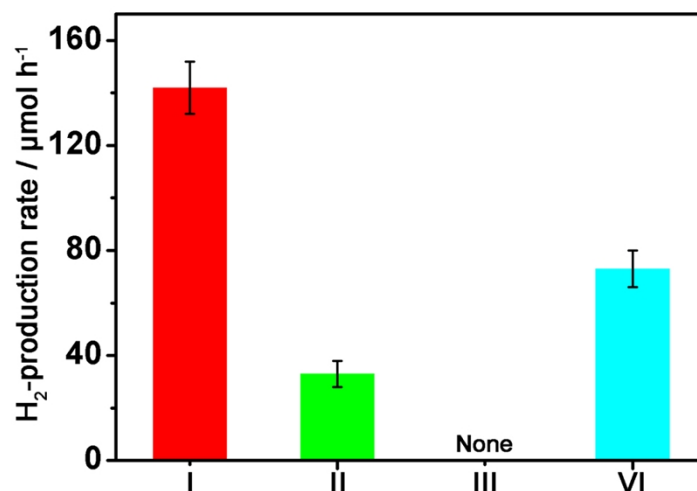

**Fig. S16** H<sub>2</sub>-production rate under different photocatalytic system containing 3DHU-CdS (5mg), Complex **I** (0.5mg) in (I) EtOH/H<sub>2</sub>O (*V:V*=1:1) and 2 mL TEA, (II) EtOH/H<sub>2</sub>O (*V:V*=1:1) without TEA, (III) EtOH and 2mL TEA, (VI) EtOH/H<sub>2</sub>O (*V:V* =1:1) and 2 mL TEOA (triethanolamine). In this Figure, we can know that the H<sub>2</sub>-production rate decreases sharply in the absence of TEA. On the other hand, when using the TEOA instead of TEA as the sacrificial agent, the rate experiences a decline. TEA as an efficient electron donor has been reported in the some literatures (Z. J. Han, WR. Mcnamara, M. S. Eum, P. L. Holland, R. Eisenberg, *Angew. Chem. Int. Ed.* 2012, 51, 1667-1670; Y. Xu, X. G. Yin, Y. Huang, P. W. Du, B. Zhang, *Chem. Eur. J.* 2015, 21, 4571-4575.). In addition, when photocatalytic system only contained EtOH and TEA, the H<sub>2</sub>-production rate is none. This preliminary result suggests that the H<sub>2</sub> comes from the water reduction. In addition, our other control experiments (now shown here) reveal that the optimized conditions for the hybrid system of 3DHU-CdS and Complex **I** are 3DHU-CdS (5 mg), Complex **I** (0.5 mg), TEA (2 mL) in EtOH/H<sub>2</sub>O (*V:V*=1:1).

**Table S5.** Summary of H<sub>2</sub> production rate of different CdS-based photocatalysts combing with Complex **I** (0.5 mg/30mL).

| Photocatalysts | Rate of H <sub>2</sub> -production<br>(μmol h <sup>-1</sup> ) | QY (%)     |
|----------------|---------------------------------------------------------------|------------|
| CdS NPs        | 15.4 ± 3.1                                                    | 0.6 ± 0.1  |
| CdS MDs        | 10.0 ± 4.0                                                    | 0.42 ± 0.2 |
| 3DHU-CdS       | 145.1 ± 10.4                                                  | 6.05 ± 0.5 |



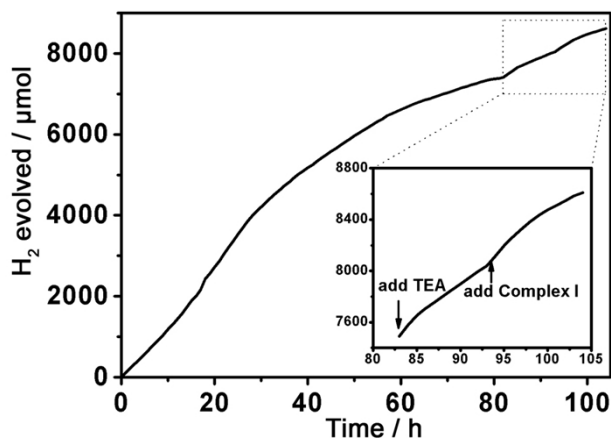

**Fig. S17** Time course of hydrogen production from system containing 3DHU-CdS (5 mg), Complex I (0.5 mg), TEA (2 mL) in EtOH/H<sub>2</sub>O (*V:V*=1:1) under visible light irradiation. The dates are the average values obtained from three independent experiments. After over 82 h irradiation, the re-addition of TEA and Ni complex successively restarted H<sub>2</sub> production. These results indicated that the deactivation of the system is mainly due to the decomposition of the Complex I and the TEA, and suggesting that the 3DHU-CdS is still active.

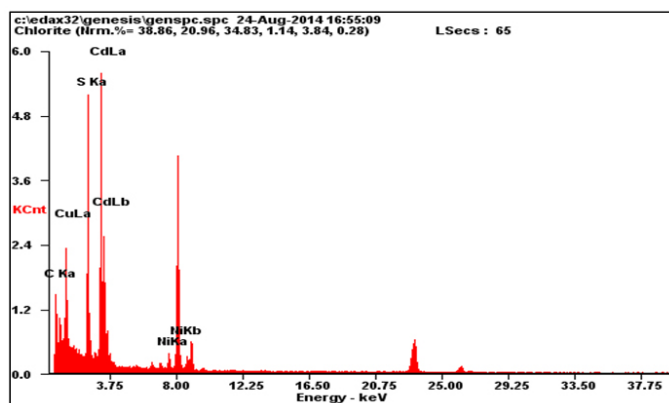

| Element | Wt %   | At %   | K-Ratio | Z      | A      | F      |
|---------|--------|--------|---------|--------|--------|--------|
| C K     | 57.72  | 87.77  | 0.1528  | 1.0361 | 0.2554 | 1.0002 |
| Cu L    | 24.03  | 6.91   | 0.1019  | 0.9367 | 0.4523 | 1.0008 |
| S K     | 5.77   | 3.29   | 0.0237  | 1.0160 | 0.3997 | 1.0113 |
| Cd L    | 12.42  | 2.02   | 0.1189  | 0.9069 | 1.0555 | 1.0000 |
| Ni K    | 0.07   | 0.02   | 0.0006  | 0.9781 | 0.8773 | 1.0000 |
| Total   | 100.00 | 100.00 |         |        |        |        |

**Fig. S18** EDS spectra of 3DHU-CdS after 110 h photocatalytic test. Note that after irradiation, the amount of Ni present is negligible, suggesting that the Complex I do not be reduced to Ni(0) during the photocatalytic test.
